# Supplementary material
Source: PubMed Central journal article supplement (PMC2987320)

### Supplementary Figure 3

#### Hierarchical Clustering between all primary tumor (T) and matastasis (M) samples

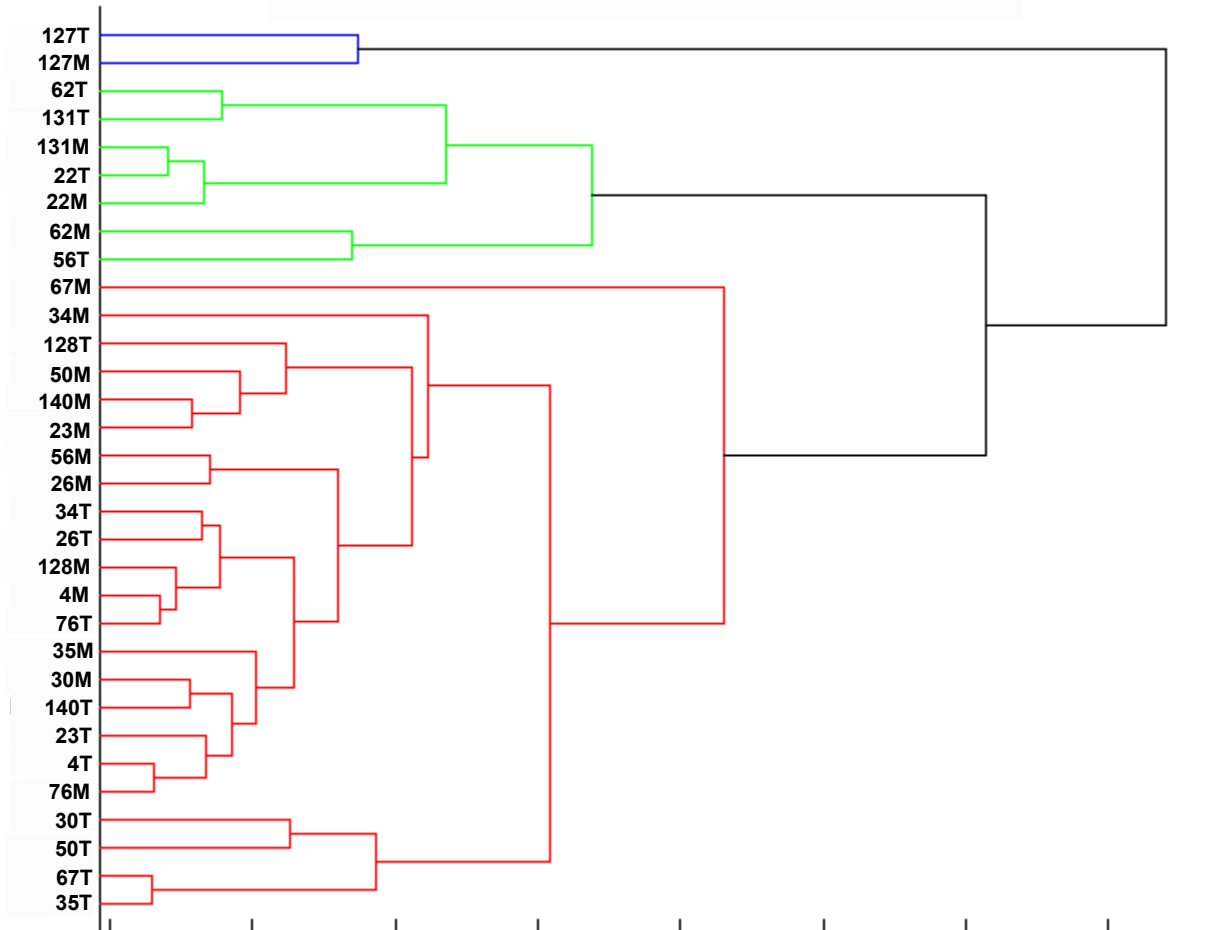

Supplement: ejhg2009230x4.pdf [file ejhg2009230x4.pdf]
